# Supplementary material for: Label-free colorimetric detection of deoxyribonuclease I activity based on the DNA-enhanced peroxidase-like activity of MIL-53(Fe)
Source: Royal Society of Chemistry journal article supplement (doi:10.1039/c9nj03006a), 2019-01-01
Supplement: c9nj03006a1.pdf [file c9nj03006a1.pdf]

## Supporting Information

### **Label-free colorimetric detection of deoxyribonuclease I activity based on DNA-enhanced peroxidase-like activity of MIL-53(Fe)**

**Chan Song,\* Wei Ding, Haibo Liu, Weiwen Zhao, Yuewei Yao and Cheng Yao\***

*School of Chemistry and Molecular Engineering, Nanjing Tech University, Nanjing 211816,  
China.*

E-mail: songchan@njtech.edu.cn (C. Song)

E-mail: yaocheng@njtech.edu.cn (C. Yao)

**Table S1.** The oligonucleotides used in this work.

| Oligonucleotides | Oligonucleotide Sequences                             |
|------------------|-------------------------------------------------------|
| <b>M1</b>        | 5'-A-FAM-3'                                           |
| <b>M2</b>        | 5'-CA-FAM-3'                                          |
| <b>M3</b>        | 5'-CCA-FAM-3'                                         |
| <b>M6</b>        | 5'-TAA CCA-3'                                         |
| <b>M12</b>       | 5'-AGG CAG TAA CCA-3'                                 |
| <b>M24</b>       | 5'-AGG CAG TAA CCA AGG CAG TAA CCA-3'                 |
| <b>M36</b>       | 5'-AGG CAG TAA CCA AGG CAG TAA CCA AGG CAG TAA CCA-3' |
| <b>A20</b>       | 5'-AAA AAA AAA AAA AAA AAA AA-3'                      |
| <b>G20</b>       | 5'-GGG GGG GGG GGG GGG GGG GG-3'                      |
| <b>C20</b>       | 5'-CCC CCC CCC CCC CCC CCC CC-3'                      |
| <b>T20</b>       | 5'-TTT TTT TTT TTT TTT TTT TT-3'                      |

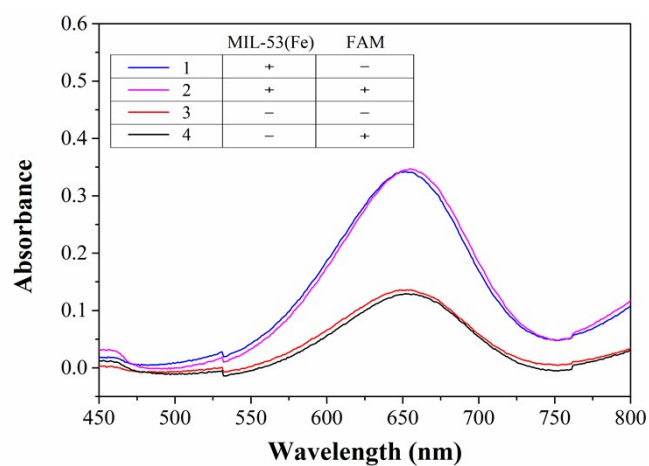

**Figure S1.** UV-vis absorption spectra of TMB and H<sub>2</sub>O<sub>2</sub> with and without the presence of MIL-53(Fe) or FAM. [TMB] = 0.2 mM, [H<sub>2</sub>O<sub>2</sub>] = 2.5 mM, [MIL-53(Fe)] = 5 µg mL<sup>-1</sup>, [FAM] = 250 nM.

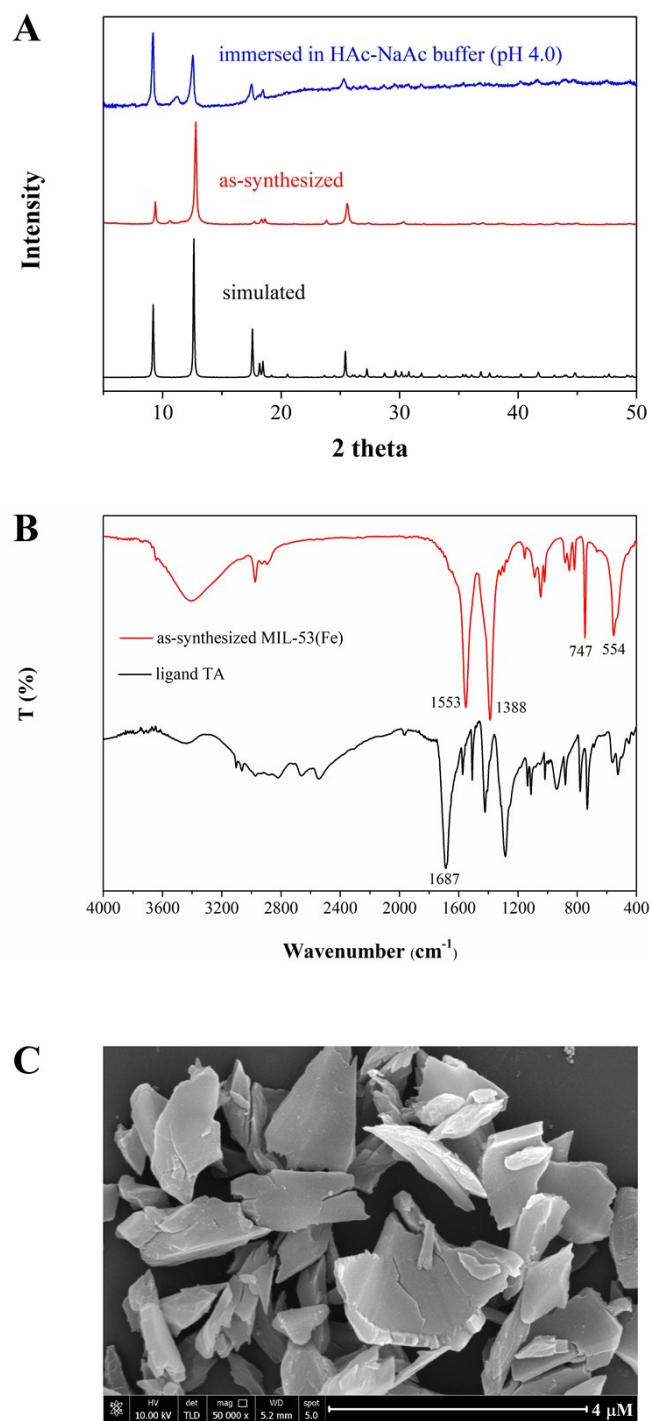

**Figure S2.** (A) PXRD patterns of MIL-53(Fe) under different conditions: simulated, as-synthesized, and immersed in 50 mM HAc-NaAc buffer (pH 4.0) under 3 h. (B) FTIR spectrum of as-synthesized MIL-53(Fe) and terephthalic acid (TA) ligand. (C) Typical SEM image of MIL-53(Fe).

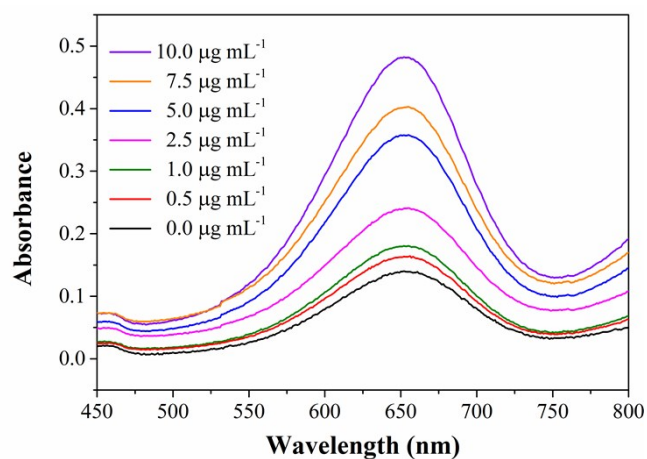

**Figure S3.** UV-vis absorption spectra of TMB and  $\text{H}_2\text{O}_2$  with different concentrations of MIL-53(Fe).  $[\text{TMB}] = 0.2 \text{ mM}$ ,  $[\text{H}_2\text{O}_2] = 2.5 \text{ mM}$ .

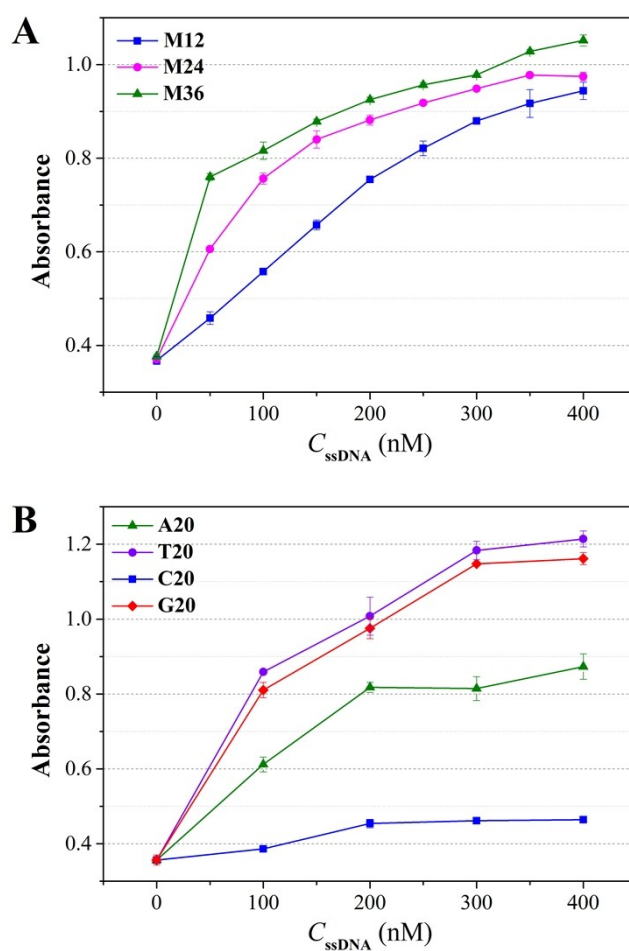

**Figure S4.** (A) Absorbance at 652 nm of reaction systems with different concentrations of **M12**, **M24** and **M36**. (B) Absorbance at 652 nm of reaction systems in the presence of 20-nt homo ssDNAs of **A20**, **G20**, **T20** and **C20**.  $[\text{ssDNA}] = 200 \text{ nM}$ .

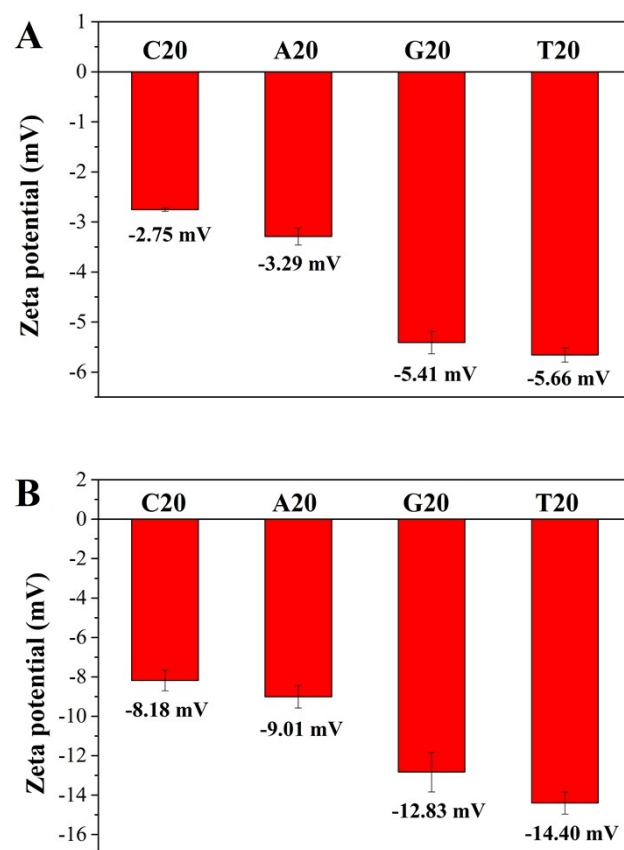

**Figure S5.** Zeta potential of 20-mer DNA homopolymer-modified MIL-53(Fe) (A) and the four types of homopolymers (B) at pH 4.0. [ssDNAs] = 200 nM.

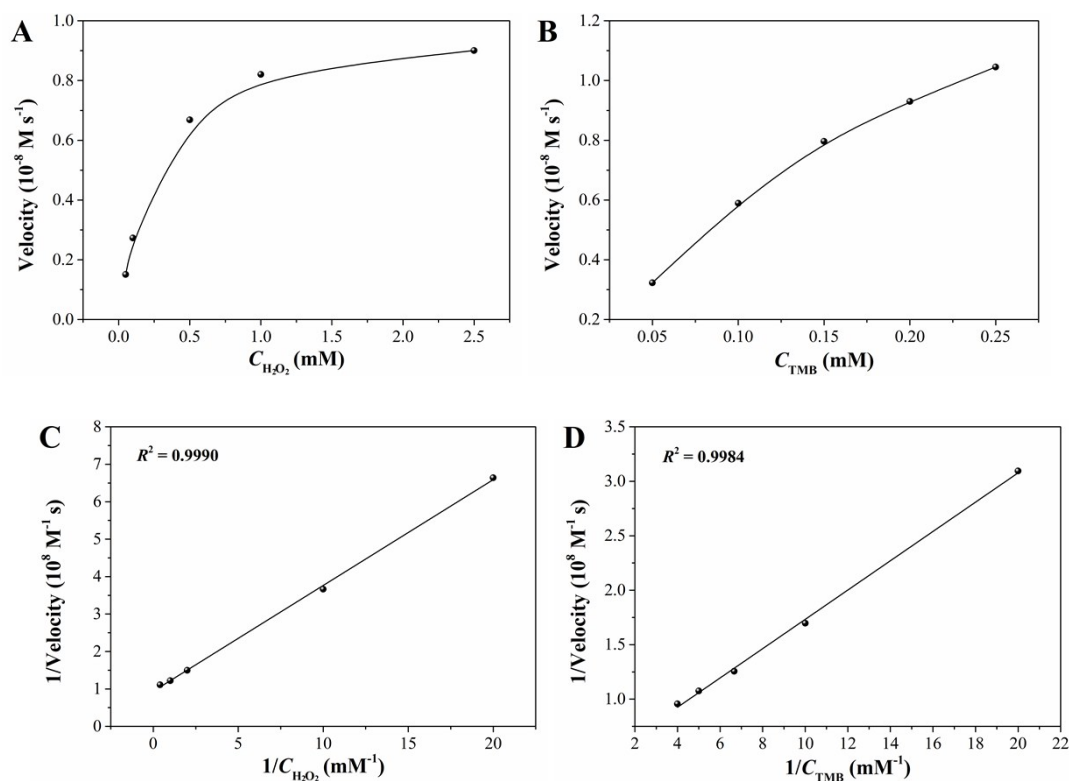

**Figure S6.** Steady-state kinetic assay of **M24**-capped MIL-53(Fe) at pH 4.0. (A) Reaction velocity plots with a fixed TMB concentration (0.2 mM) and various  $\text{H}_2\text{O}_2$  concentration. (B) Reaction velocity plots with a fixed  $\text{H}_2\text{O}_2$  concentration (2.5 mM) and various TMB concentrations. (C and D) Double reciprocal plots of the **M24**-capped MIL-53(Fe) with the concentration of one substrate ( $\text{H}_2\text{O}_2$  or TMB) varied.  $[\text{M24}] = 200 \text{ nM}$ ,  $[\text{MIL-53(Fe)}] = 5 \mu\text{g mL}^{-1}$ .

**Table S2.** The Michaelis–Menten constant ( $K_m$ ) and maximum initial velocity ( $V_{\text{max}}$ ) of MIL-53(Fe) and ssDNA-capped MIL-53(Fe) at pH 4.0.

| Catalyst                         | Substrate              | $K_m$ (mM) | $V_{\text{max}}$ ( $10^{-8} \text{ M s}^{-1}$ ) | Reference        |
|----------------------------------|------------------------|------------|-------------------------------------------------|------------------|
| <b>MIL-53(Fe)</b>                | $\text{H}_2\text{O}_2$ | 0.04       | 1.86                                            | 1                |
|                                  | TMB                    | 1.08       | 8.78                                            |                  |
| <b>ssDNA-modified MIL-53(Fe)</b> | $\text{H}_2\text{O}_2$ | 0.35       | 2.58                                            | <b>This work</b> |
| <b>MIL-53(Fe)</b>                | TMB                    | 0.30       | 1.07                                            |                  |

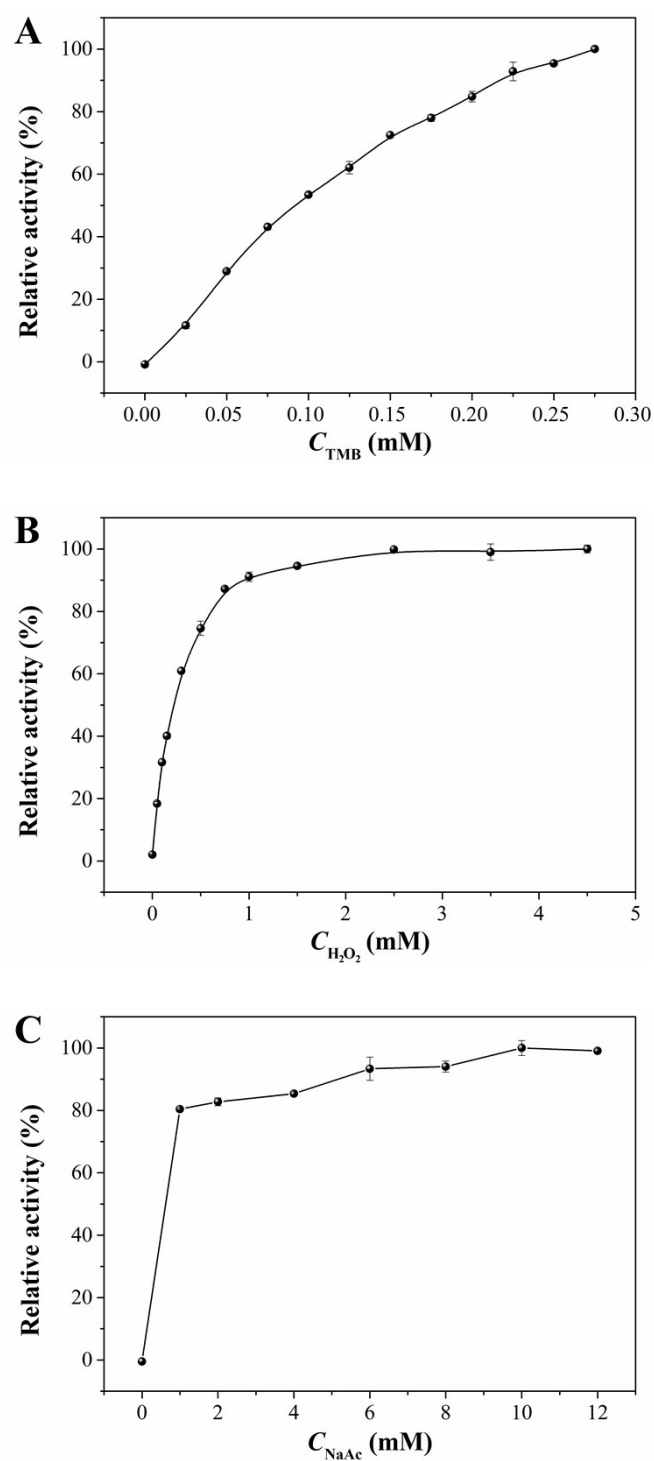

**Figure S7.** Effect of (A) TMB concentration, (B)  $\text{H}_2\text{O}_2$  concentration, (C) NaAc concentration on the peroxidase-like activity of DNA-modified MIL-53(Fe). The absorbance was read at the maximum absorbance of 652 nm and the maximum point in each curve was set as 100 %.  $[\text{M24}] = 200 \text{ nM}$ ,  $[\text{MIL-53(Fe)}] = 5 \mu\text{g mL}^{-1}$ .

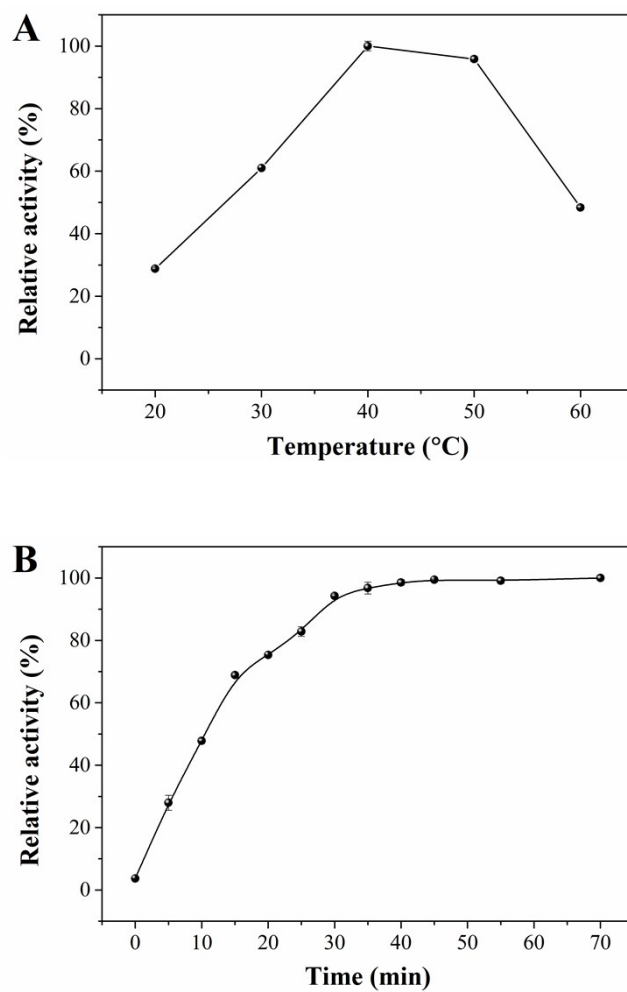

**Figure S8.** Effect of TMB oxidation temperature (A) and time (B) on the peroxidase-like activity of DNA-modified MIL-53(Fe). The absorbance was read at the maximum absorbance of 652 nm and the maximum point in each curve was set as 100 %. [M24] = 200 nM, [MIL-53(Fe)] = 5  $\mu\text{g mL}^{-1}$ .

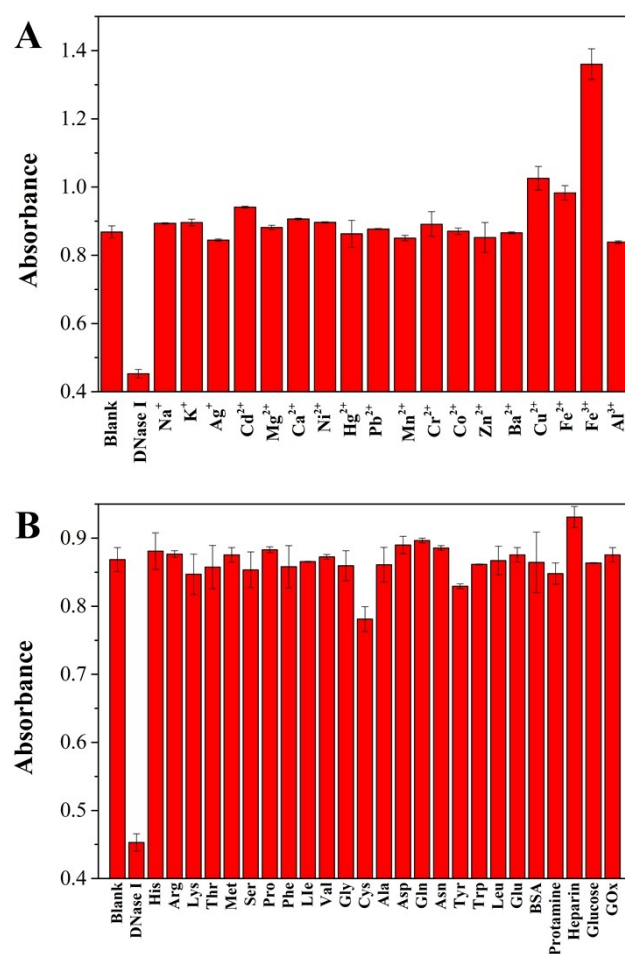

**Figure S9.** The specificity of the DNase I activity assay. Concentrations of BSA, protamine, heparin and GOx are 1  $\mu\text{g mL}^{-1}$ . Amounts of metal ions, amino acids and glucose are 1  $\mu\text{M}$ . [DNase I] = 10 U  $\text{mL}^{-1}$ .

**Table S3.** Comparison of this method with other conventional methods.

| Methods                                                                                           | Linear range<br>(U mL <sup>-1</sup> ) | Detection limit<br>(U mL <sup>-1</sup> ) | Reference        |
|---------------------------------------------------------------------------------------------------|---------------------------------------|------------------------------------------|------------------|
| <b>Electrochemical</b> method based on a gold electrode through the sulfur–gold linkage           | 0.10–10                               | 0.10                                     | 2                |
| <b>Potentiometric</b> method based on a polycation-sensitive membrane electrode                   | 1–10                                  | 0.45                                     | 3                |
| <b>Fluorescence</b> method based on DNA-templated silver nanocluster/graphene oxide nanocomposite | 0–10                                  | 0.10                                     | 4                |
| <b>Fluorescence</b> method based on a graphene oxide - quenched hairpin probe                     | 2–70                                  | 1.0                                      | 5                |
| <b>Fluorescence</b> method based on malachite green/G-quadruplexes                                | 5–100                                 | 1.0                                      | 6                |
| <b>Fluorescence</b> method based on graphene oxide as sensing platform                            | 1.75–70                               | 1.75                                     | 7                |
| <b>Colorimetric</b> method based on photoinduced synthesis of AuNPs                               | 0.5–10                                | 1.58                                     | 8                |
| <b>Colorimetric</b> method based on DNA-enhanced peroxidase-like activity of MIL-53(Fe)           | 0.2–7                                 | 0.09                                     | <b>This work</b> |

**Table S4.** Analytical results for DNase I activity in 1% human serum samples.

| Sample | Added (U mL <sup>-1</sup> ) | Determined (U mL <sup>-1</sup> ) | Recovery (%) |
|--------|-----------------------------|----------------------------------|--------------|
| 1      | 0                           | Not detectable                   | —            |
| 2      | 1                           | 1.02 ± 0.08                      | 102.0 ± 8.0  |
| 3      | 2                           | 1.83 ± 0.02                      | 91.5 ± 1.0   |

## References

- (1) Ai, L.; Li, L.; Zhang, C.; Fu, J.; Jiang, J. MIL-53(Fe): A Metal-Organic Framework with Intrinsic Peroxidase-Like Catalytic Activity for Colorimetric Biosensing. *Chem. Eur. J.* **2013**, *19*, 15105-15108.
- (2) Sato, S.; Fujita, K.; Kanazawa, M.; Mukumoto, K.; Ohtsuka, K.; Waki, M.; Takenaka, S. Electrochemical Assay for Deoxyribonuclease I Activity. *Anal. Biochem.* **2008**, *381*, 233-239.
- (3) Ding, J.; Qin, W. Potentiometric Sensing of Nuclease Activities and Oxidative Damage of Single-Stranded DNA Using a Polycation-Sensitive Membrane Electrode. *Biosens. Bioelectron.* **2013**, *47*, 559-565.
- (4) Lee, C. Y.; Park, K. S.; Jung, Y. K.; Park, H. G. A Label-Free Fluorescent Assay for Deoxyribonuclease I Activity Based on DNA-Templated Silver Nanocluster/Graphene Oxide Nanocomposite. *Biosens. Bioelectron.* **2017**, *93*, 293-297.
- (5) Xu, W.; Xie, Z.; Tong, C.; Peng, L.; Xiao, C.; Liu, X.; Zhu, Y.; Liu, B. A Rapid and Sensitive Method for Kinetic Study and Activity Assay of DNase I in Vitro Based on a GO-Quenched Hairpin Probe. *Anal. Bioanal. Chem.* **2016**, *408*, 3801-3809.
- (6) Sun, S. K.; Wang, B. B.; Yan, X. P. A Label-Free Near-Infrared Fluorescent Assay for the Determination of Deoxyribonuclease I Activity Based on Malachite Green/G-Quadruplexes. *Analyst* **2013**, *138*, 2592-2597.
- (7) Zhou, Z.; Zhu, C.; Ren, J.; Dong, S. A Graphene-Based Real-Time Fluorescent Assay of Deoxyribonuclease I Activity and Inhibition. *Anal. Chim. Acta* **2012**, *740*, 88-92.
- (8) Jung, Y. L.; Lee, C. Y.; Park, J. H.; Park, K. S.; Park, H. G. A Signal-On, Colorimetric Determination of Deoxyribonuclease I Activity Utilizing the Photoinduced Synthesis of Gold Nanoparticles. *Nanoscale* **2018**, *10*, 4339-4343.
